# Supplementary material for: Precision Medicine in Rural Settings: Patient Perspectives on Clinician-Ordered Genetic Testing
Source: Research Square preprint supplement (doi:10.21203/rs.3.rs-9097740/v1), 2026-04-14
Supplement: Supplementary file 1 [file 3d966fe92740eec5fa3a8208.docx]

**
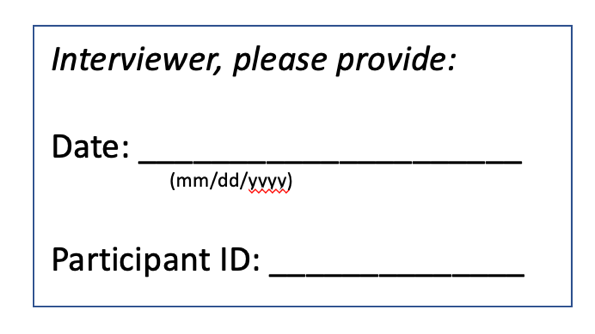
**Hi, my name is _________. Thank you for agreeing to share your thoughts during this interview. I am going to be asking you questions about your experiences with genetic testing.

Before we begin the interview, I need to ask you a few questions to confirm that you’re eligible to participate.

What zip code do you live in?

What town is that zip code in?

What county and state is your town in?

What is your mobile phone number?

How old are you today?

What is your birthdate?

What kind of genetic testing have you discussed with a healthcare provider:

Have you ever received genetic testing from a healthcare provider?

Thank you!

**[If participant cannot easily answer any question, or provides >3 responses that are different from their REDCap screening responses, thank interviewee for time, inform them that our needs have changed but you may be in touch if we wish to interview them later.]**

[**If continuing with interview**] Thanks for taking the time to answer those questions. We would like to continue with the interview.

There are no right or wrong answers to these questions and different people can have different thoughts and opinions. I am interested in hearing what you think.

This interview will last about 30 minutes. My role is to ask questions and listen to your responses and take notes. I want you to feel free to say anything you are thinking. Please remember that you may choose not to answer any question and you may stop participating at any time; just let me know.

You do not have to participate. Your participation will not in any way effect the health care that you receive. Your healthcare providers will not learn about your answers to these questions.

If you choose to participate you will receive $75 to thank you for your time. We’ll talk more about that after the interview is over.

I would also like to remind you that this interview will be recorded, and that the recordings will be heard only by this project’s research staff or by a professional transcriptionist. We will remove any information that could identify you in the interviews during the transcription process. We will share anonymized transcripts from this study with other people by depositing them in a public access repository. We will only use your responses for research purposes.

Any questions before we get started? [**Answer questions**]

[**Start recording**]

**Introduction**

This is resident <<>> and today is << >>. I just want to confirm, do we have your permission to interview you and record the interview?

[**If no, turn off recorder. Ask if individual wants to remain in study. If individual still wants to be in study, continue with interview and start taking notes about participant’s responses. If participant does NOT want to be in study, thank them for time and close interview.**]

[**if yes, continue**]: Thank you

I want to briefly explain genetic testing because there are many types. We’re interested in a particular type of genetic testing. It is called different names, like prenatal carrier testing or reproductive carrier screening. In this type of genetic testing, the lab is looking for changes or variations in genes that might not affect a person’s own health but could cause serious health issues in a child if both parents carry a variation in the same gene. I’m going to call this type of genetic testing prenatal carrier testing. It is important to know that, in most cases, if the lab finds a gene variation during carrier testing, it does not mean that the who was tested will develop a health condition.

During this interview, we will be talking about carrier genetic testing that a healthcare provider discussed with you. So, we’re not going to discuss genetic testing that you may have received through 23AndMe or ancestry.com or any other genetic testing that a healthcare provider may have discussed with you or genetic testing that you obtained without a healthcare provider’s help.

If you ever have any questions about what kind of genetic testing we’re talking about, please ask me and I’ll do my best to be clearer.

**First, I'd like to ask you a broad question about where you live.**

1. How long have you lived in <<>>? Tell me about how you decided to live there.

***Probes***

What do you like about living there?

What do you *dis*like about living there?

**Now, I want focus on genetic testing, specifically *any* kind that a healthcare provider has discussed with you.**

1. What do you think you can learn from genetic testing that a healthcare provider discusses with you?

***Probes***

What would you *want* to learn from genetic testing? What would you *not* want to learn?

**Now, I want to know a bit about any prenatal carrier testing that a healthcare provider talked with you about. Before I ask you any questions, would you like me to describe what prenatal carrier testing is again?**

[**if yes**]In prenatal carrier testing**,** a lab is looking for changes or variations in genes that might not affect a person’s own health but could cause serious health issues in a child if both parents carry a variation in the same gene.

[**if no**, continue with interview]

1. Can you tell me about a time when a healthcare provider talked with you about prenatal carrier testing?

*[Note: If participant says they don’t remember, ask, “you don’t remember anything?” without incredulity or surprise. The HCP can be ANYBODY. Doesn’t have to be somebody that they see regularly or even remember the name of.]*

***Probes***

Walk me through the conversation.

How many times have you talked with a healthcare provider about prenatal carrier testing?

What do you remember learning about the genetic testing?

How did the conversation make you feel?

What made you more interested in the testing?

What made you less interested in the testing?

1. Tell me a bit about how you decided whether to get the carrier genetic testing that <<insert provider type or name>> talked with you about?

*[Note: if participant seems uncertain, tell them, “People make these decisions in a lot of different ways. We’re wondering how you thought about it?” If person responds indicating that cost/insurance was a significant factor, ask them “What else?”]*

***Probes:***

What seemed important or unimportant about genetic testing?

Who did you talk to when you were thinking about it?

How important do you think it was to the healthcare provider that you got the carrier testing?

1. What is the most important thing that would need to change for you to make a different decision about getting carrier genetic testing?

*[Note: You can clarify that we don’t want them to make a different decision about genetic testing, we just want to understand what was important to them. If participant indicates that cost/insurance would need to change, ask them “What else?” If participant just lists something, ask them to tell you more about how they would like for the thing to change.]*

***Probes***

What made getting genetic testing easier?

What made getting genetic testing harder?

What made your decision feel like the right one?

Was there information that you particularly wanted to learn or didn’t want to learn?

1. When you discussed the prenatal carrier testing, were you living with a spouse or romantic partner?

***Probes***

**If yes,** did you talk with them about the prenatal carrier testing? **If yes**, can you tell me about those conversations?

**If not**, tell me about why you two didn’t talk about carrier testing?

**Thank you so much for taking the time to share your thoughts. I really appreciate it.** **Now I want to ask you some final questions about you.**

1. Do you have a family history of any diseases or conditions that you think are inherited?

£ Yes

If yes, what are the condition?______________________

£ No

1. Have you ever been diagnosed with a condition that you think is inherited?

£ Yes

If yes, what are the conditions?______________________

£ No

1. Have you ever had genetic testing?

£ Yes

If yes, what do you remember being tested for?___________________

£ No

1. How long do you travel to get to your primary care appointments

# of minutes?_____________________

1. How old are you today? ____________
2. What is the highest level of schooling that you have completed?

£ Elementary school

£ Junior high or some high school

£ High school diploma or Graduate Equivalency Diploma (GED)

£ Some college or Associate degree

£ College degree or higher

1. Are you of Hispanic, Latino/a, or Spanish origin, like Mexican, Puerto Rican or Cuban?

£ Yes

£ No

1. How would you describe your race and ethnicity? You can choose multiple categories.

£ American Indian or Alaska Native

£ Asian

£ Black or African American

£ Native Hawaiian or other Pacific Islander

£ White

£ Other…please describe_______________________________

1. Do you describe yourself as a man, a woman, or in some other way?

£ Man

£ Woman

£ Some other way

1. Are you currently living with a spouse or a romantic partner?

£ No

£ Yes

**That is the end of the questions that I’d like to ask you. Do you have anything that you would like to be sure I know?**

**I want to be certain that you receive the $75 that we talked about. I need to confirm your email address. This is the address to which the service will send an email explaining how to obtain the money, so I want to be certain I get it right.**

**Email address: __________________________________**

**I also will need your date of birth. Can you please share your date of birth with me?**

**DOB: ___________________________________________**

**Thank you so much**
