# Supplementary material for: Precision Medicine in Rural Settings: Patient Perspectives on Clinician-Ordered Genetic Testing
Source: Research Square preprint supplement (doi:10.21203/rs.3.rs-9097740/v1), 2026-04-14
Supplement: Supplementary file 2 [file a06a94c7511c2c8acf2fe361.docx]

Table 1. Participant characteristics

| **Characteristic** | **Sample  (n=30)** |
| --- | --- |
| **Age** (years) (M, range, SD) | 44, 19 - 74, 14.9 |
| **Education** | N |
| Junior high or some high school | 2 |
| High school diploma or GED | 2 |
| Some college or an Associate's degree | 9 |
| College degree or higher | 17 |
| **Hispanic/Latino/Latinx** | 5 |
| **Race or origin** (categories not mutually exclusive) |  |
| White | 28 |
| American Indian or Alaska Native | 1 |
| Some other race or origin | 2 |
| **Residential county RUC code** |  |
| 4 | 2 |
| 5 | 8 |
| 6 | 4 |
| 7 | 9 |
| 8 | 2 |
| 9 | 5 |
| **Residential state** |  |
| Idaho | 6 |
| Montana | 3 |
| Nevada | 9 |
| Utah | 5 |
| Wyoming | 7 |
| **Gender identification** |  |
| Man | 8 |
| Woman | 22 |
| **Family history of disease believed to be inherited** | 25 |
| **Personal history of disease believed to be inherited** | 19 |
| **Discussed genetic testing with a clinician, and did NOT receive genetic testing** | 8 |
| **Discussed genetic testing with a clinician, and DID receive genetic testing** | 22 |

Table 2. Themes and quotes related to PRISM domain participant perspectives on genetic testing

| **Themes** | **Quotes** |
| --- | --- |
| Genetic testing is often understood as offering clarity and reassurance, even when its clinical scope is limited. | “Different things that might affect my health down the line. Since I'm a single mom it's just being able to prepare for things.” (D-23) |
| “Just for peace of mind just to let us know if there was anything to expect.” (R-22) |
| "It didn’t explain why the cancer reoccurred… that’s something I was hoping to get an answer to.” (D-16) |
| “We felt like we were gonna have peace of mind and knowledge. Nobody can know what's in the future, but if you can get a clue or some information, it can help you plan.” (R-05) |
| Genetic testing is a moral and relational responsibility to protect family members across generations. | “It’s important not only for me… but also for my [children].” (D-03) |
| “We’re doing this for our kids and more for than for ourselves.” (R-06) |
| “I wanted to know if there was a chance of passing anything on my children.” (R-07) |
| That was good to learn [no pathogenic variants identified on genetic testing], so I didn't have to tell my kids, ‘Hey, watch out for that.’” (D-21) |
| Clinician framing and relationships with participants inform participants’ understanding of genetic testing. | “"Oh, I think [clinician's] fantastic. I thought [genetic testing after cancer recurrence] was fine. I thought it was great.” |
| "If [PCP]’d be like, ‘Hey, I recommend an additional set of labs… I would recommend getting the genetic testing,’ I’d be like, ‘Oh, okay.’” (D-04) |
| “The [clinician]…said, based off of the information you've given me, it's unlikely that [the disease] would be passed genetically, but if you want, we can double check it.” (R-08) |
| “[Clinicians] were very reassuring. They made it very easy. I did feel like there was very good communication between my doctor…and <hospital ~290 miles from home>.” (R-23) |
| Perceived value of genetic testing is relative to its cost and insurance coverage. | “We just decided that the information for our family was unnecessary, then it would be an unnecessary financial investment as well.” (R-12) |
| “When they tell you like, ‘Your insurance covers it 100 percent,’ I was like, ‘Well, why not then?’” (R-13) |
| “I think I'd still—even if I'd have known the cost, we still would've done it. ’Cause I want to learn why my body's doing what it's doing.” (D-19) |
| “Well, cost is a factor, but cost is not a factor of knowin’ the truth.” (D-17) |
| Genetic testing is a practical tool to anticipate future decisions. | “…Just to help prepare my loved ones if it was a disease that would cut my life short, then it's like, 'Okay. Let's get my affairs in order and help prepare everyone kind of a thing.'” (R-16) |
| “If I have a kid with CF I have to plan now. Because I don't know if I would stay in <Place>.” (R-03) |

Table 3. Themes and illustrative quotes related to PRISM domain participant understanding of clinician perspectives on genetic testing.

| **Themes** | **Quotes** |
| --- | --- |
| Clinicians helped participants understand the clinical actionability and importance of genetic testing. | "I think it [genetic testing] was important [to clinician]. I mean, anything [clinician] brings up—[they're] not bringing up anything that’s unimportant, so yeah, it was important.” (D-16) |
| “[Genetic testing] helped [clinician] recommend a less intense monitoring regimen. Then [they] would've recommended a different birthing plan.” (R-05) |
| “I don't think they really had a preference either way. It seemed like they were just informing us of options but wasn't pressuring us either way to get it done or not.” (R-12) |
| "I don't think it was that important [to the clinicians]… they did one surgery and then they signed me off to another doctor.” (D-25) |
| Clinician knowledge gaps and uncertainty influence discussions with participants and referrals. | “[Clinician]'s like, ‘I don't really know what genetic thing.’” (D-04) |
| "They don’t know enough, they can't test for it… just give me a little blanket answer.” (R-07) |
| "[Clinician] didn't seem like they knew very much…so it was not something they really pushed.” (R-10) |
| “[Clinician] didn't quite know what to do with that genetic test results.” (D-18) |
| Clinicians use genetic testing as a tool for clinical management. | “It helped them recommend a less intense monitoring regimen… and a different birthing plan.” (R-05) |
| “Part of it was then they’d know… what route we would take on follow-up stuff.” (D-15) |
| “The goal… was to see if there were anything we needed to be concerned about for the baby.” (R-21) |
| “It's essential… they didn't know how to treat it without that information.” (D-21) |
| Clinician engagement and follow-through vary widely and affect how supported patients feel. | “They were doing all the initiating, all the communication… ‘Let us help you do this.’” (R-13) |
| “I appreciated them going just a little bit extra effort to research.” (R-16) |
| "They didn’t jump up and down. They weren’t excited.” (D-18) |
| “I felt very brushed off… I didn’t feel satisfied with the answer.” (D-19) |

Table 4. Theme and illustrative quotes related to PRISM domain patient characteristics.

| **Theme** | **Quotes** |
| --- | --- |
| Participants' family health history informs their risk perception. | “In my family, it's a genetic disease. It's called <disease>, and it runs through my family. There's not much on it.” (D-28) |
| "We wanted to find out if that was a genetic thing because both of my [grandparents] had passed away, and they had [organ] cancer.” (D-23) |
| “I’ve had [organ] cancer in the family… I’ve had two [siblings] died of cancer. That was probably my biggest concern was the cancer side of it.” (D-26) |
| “I know there's been a couple people in my family that did have heart problems, so I do believe at least part of my heart problems is definitely genetic.” (D-22) |

Table 5. Theme and illustrative quotes related to the PRISM domain clinician characteristics.

| **Theme** | **Quotes** |
| --- | --- |
| Clinician communication and interpersonal practices influence rural resident trust, understanding, and perceived quality of care. | “I found a couple of good ones [doctors] that they'll actually sit down and talk to you as long as they need to to figure out what you need and what they need to do.” (D-23) |
| "They're just here then they're gone… There is a lot of suboptimal people that you end up with, with rural healthcare.” (D-22) |
| They explained in a little bit more detail the process of getting tested, what it meant, and then how <disease> works… they were able to also give a little bit more insight on the unknowns that neither me nor my [parent] knew.” (D-28) |

Table 6. Themes and illustrative quotes related to the PRISM domain organizational characteristics (around rural healthcare).

| **Themes** | **Quotes** |
| --- | --- |
| Limited organizational capacity and outdated services constrain genetic testing delivery. | “They certainly didn’t offer spinal muscular atrophy [carrier screening] initially. They were pretty outdated. They did the old quad screens or integrated screening.” (R-03) |
| “There is a hospital here, it’s just the number of services it offers is limited.” (D-16) |
| “I think they’re fully equipped to take the sample for something like [reproductive carrier genetic screening]. They don’t process any of the samples in that clinic. They send them all out anyway.” (R-12) |
| “They don’t do the genetic testing at their hospital—[clinician] would have to send me to another hospital to do it.” (D-25) |
| Fragmented referral and scheduling processes delay and deter genetic testing. | “It was such a headache for me to actually get my referral [for genetic counseling] to go through… I got my referral in February and didn’t meet with them until June.” (R-07) |
| “If you really do want this test, you have to make an appointment with this lab. You have to come back.” (R-16) |
| “They did genetic testing and then I never heard anything about it… then they finally looked through all my records and found, yes, I did actually do it.” (D-22) |
| “It took two months to get them to schedule it.” (D-26) |
| Organizational integration of genetic testing facilitates its uptake. | “Maybe something like that would be easier, or even if they just had a place here in town that was close.” (D-03) |
| “I think they did that blood draw during the amniocentesis… because it was a little bit of a drive, so I wanted to get as many things done as I could at the same time.” (R-23) |
| “They sent the tests off automatically… just to see what I had.” (D-21) |
| “They offered it to me, and they went and took my blood right there and sent it off.” (R-22) |
| Organizational and clinician communication and follow-up affect patient experience with genetic testing. | “Maybe it would have been good if I had had more of a conversation… more of an in-depth conversation.” (R-06) |
| “I just wish there was a little bit more follow-up with it [genetic testing].” (D-18) |
| “[Clinicians] relay so much information so fast that I can’t retain it.” (D-22) |
| “We went to a third-party facility. Did the genetic. They did the bigger 20-week ultrasound and all that, so they’re the ones who walked us through it. If there was anything for concern, then they would’ve contacted our OB.” (R-21) |

Table 7. Themes and illustrative quotes related to the PRISM domain external environment.

| **Themes** | **Quotes** |
| --- | --- |
| Geographic isolation and travel burden make it harder for participants to obtain genetic testing and healthcare. | “It would've been nice if I could've done it closer to home, but time and travel, convenience are big for me.” (D-03) |
| “Living in a rural area, it was a lot more challenging to access this… having to take days off of work, even just the gas to travel back and forth.” (R-05) |
| “Because we live in such a middle of nowhere area—if there was a way to do [genetic testing] where we didn't maybe have to drive 300 miles to go get it done, go back and drive another 300 miles to get the test results, that would be a huge help.” (R-10) |
| If the [medical center in metropolitan city ~95 miles away] would create an office up here I would be thrilled.” (D-18) |
| Limited local healthcare capacity leads participants to rely on distant healthcare systems. | “They don’t have [a genetic counselor] in <City>. The only one that was nearby was… [~236 miles from residence].” (R-07) |
| “There is a hospital here [in rural City of residence], it’s just the number of services it offers is limited.” (D-16) |
| “We don’t have a lot of specialists, we don’t have a lot of options. We definitely only have one hospital in this area.” (R-19) |
| “There’s always that downfall that we live in a small community and there's not always the resources that we need. That's why I travel to <medical facility ~150 miles home> because—yeah, the best of the best.” (D-25) |
| Insurance and billing complexity add layers of access difficulty within rural healthcare systems. | "“Of course, I would have loved to be able to do all the treatment here [rural city of residence] or all those sort of things here, but as far as I know, had I chosen to do my treatment in <nearby City>, it would be scattered. Everything would be scattered, so that’s why I did it through <healthcare facility ~283 miles from city of residence>.” (D-16) |
| “The military was the only place that I knew that was really covering [reproductive carrier genetic screening].” (R-10) |
| “[Genetic testing is] often not something your insurance covers. I think that would have played a factor, just being younger.” (R-21) |
| “I’m gettin’ bills from five different places ’cause they had to send out for bloodwork… ‘Can’t you just put it all in one bill?’” (D-23) |

Table 8. Theme and illustrative quotes related to the PRISM domain implementation and sustainability infrastructure.

| **Theme** | **Quotes** |
| --- | --- |
| Routine integration of genetic testing into standard prenatal care workflow normalizes and sustains testing. | “I just got lumped into all the first trimester screenings.” (R-04) |
| “They have <laboratory>. They do it [RGCT] here.” (R-03) |
| "We’d like to send you to high-risk for that.” (R-05) |
| “I was in for a visit. They offered [genetic testing] to me, and they went and took my blood right there and sent it off.” (R-22) |

Table 9. Themes and illustrative quotes related to IOF outcome acceptability.

| **Themes** | **Quotes** |
| --- | --- |
| Desire for knowledge and reduced uncertainty increases acceptability of genetic testing. | “Mostly I just wanted to know am I gonna get cancer? Is this something that I'm at risk for, or am I not?” (D-03) |
| "...I feel like knowledge is power…I don't think ignorance is bliss for me.” (R-04) |
| "I just wanted to be certain if that could be passed onto my children or not.” (R-07) |
| “We need answers, not guessing.” (D-17) |
| Family responsibility and concern about passing on condition increases acceptability. | "We’re doing [reproductive carrier genetic screening] for our kids and more for than for ourselves.” (R-06) |
| “Now that I've been through all I've been through with my cancer and everything, I wish I would have done genetic testing before I ever had kids.” (R-10) |
| "Just the fact that it [genetic testing] might help my kids out.” (D-15) |
| “They can get tested earlier than what I did for this.” (D-17) |
| Ease and convenience strongly influence acceptability. | “If it were a different more difficult procedure or even a blood draw, it would've been a little bit more difficult.” (D-03) |
| “Ease of use was a real benefit, ’cause [sample collection] was a blood draw that was done right in the OB’s clinic.” (R-05) |
| “If [reproductive genetic carrier screening] would’ve been easier, I think I would’ve for sure been like, ‘Yes, let’s do it.’” (R-16) |
| "I did [genetic testing] the same day at the same time I saw that doctor.” (D-18) |
| Cost and insurance coverage affect acceptability. | “I don't wanna really keep adding all these expenses. I don't make a ton of money a year.” (D-04) |
| “When they tell you like, “Your insurance covers it 100 percent." I was like, "Well, why not then?"” (R-13) |
| “We don’t have $1,000 right now.” (R-16) |
| “…luckily I had state coverage at that point, so I didn't really receive any bills. I was completely covered.” (D-23) |
| Clinician framing and recommendation legitimize acceptability | “I think if [PCP]’d be like, ‘Hey, I recommend an additional set of labs or something, I would recommend getting the genetic testing,’ I'd be like, ‘Oh, okay.’” (D-04) |
| “I really liked the way that she [genetic counselor] explained [genetic testing].” (R-05) |
| “I’m glad the provider brought it up as an option for us so that we knew that it was something we could do.” (R-12) |
| "[Clinician] didn’t push us to do [genetic testing], but [they] just thought it would be a really good idea ” (D-15) |
| Emotional readiness and mental load shape acceptability. | “Then I got worried… ‘What do I do from there if I do have this?’” (D-03) |
| “It didn’t quite seem worth the trouble… I already had a lot of anxiety.” (R-16) |
| “It went from being something I didn’t really think about to something very overwhelming.” (R-23) |
| "I have really bad anxiety, so not knowing the unknown.” (D-25) |
| Perceived actionability increases acceptability. | “If I'm having a Down syndrome baby, then I'm not gonna deliver at this hospital because they don't have a NICU.” (R-04) |
| “Understanding that information gives you options to decide what you want to do with the pregnancy.” (R-05) |
| “[Genetic testing]'s essential to [clinician] because they didn't know how to treat it without that information.” (D-21) |
| “If there's somethin' that I can do to prevent 'em then that's what I wanna do.” (D-23) |
| Autonomy and personal values determine acceptability. | “You could be a carrier and your [spouse] could be a carrier and it might not even be—and it could be very likely that the child would have that and then it might not…ultimately it’s the Lord who decides.” (R-12) |
| "I just didn’t care [about the genetic testing], truthfully. This baby was mine, and I take it anyway I had it.” (R-17) |
| "I’d hate to have something I’d give to somebody else.” (D-21) |
| “I get why [parent] doesn’t wanna do it… [they’ve] had cancer numerous times… [they] don’t wanna know if there’s anything else creeping up on [them].” (D-25) |

Table 10. Themes and illustrative quotes related to the IOF outcome appropriateness.

| Family and family health history affects perceived appropriateness of genetic testing. | “We initiated the genetic testing to begin with is because of my family history of cancer.” (D-03) |
| --- | --- |
| “We just decided that the information for our family was unnecessary… we just decided, based on that history from our families, that we didn't want to pursue.” (R-12) |
| “I was younger… I was like, "You know what? I don't have enough concern for any of these other conditions. I don't have any family members in extended families that have had any of these things.” (R-16) |
| “I requested it simply because I have a [relative] who died of [organ] cancer, and I was urged by my family to get tested.”(D-16) |
| Genetic testing is perceived as appropriate to protect family. | “When I had it the purpose of the genetic testing was to see if I had <disease> because my daughter was having many symptoms connected to that disorder.” (D-18) |
| “I have [disease] and we were wanting to make sure that there wasn't a chance I was going to pass that [disease] to my posterity as well.’” (R-08) |
| "I think if I knew that there was a chance—a high likelihood of something being wrong with the child, I maybe wouldn't have had a second child.” (R-22) |
| “...but the biggest thing was to make sure I didn’t have something I could pass on to my kids.” (D-26) |
| Clinician recommendation and enthusiasm signal appropriateness. | “If it's something that the doctor is suggesting, we take that into account, too, and we feel like that's important to consider…” (R-06) |
| “I actually had some [tests] done right when I had my cancer diagnosis… my oncologist recommended doing it.” (D-15) |
| "All [clinician] said was, ‘I’m very curious,’… [they] wanted to go through all [their] records to help [them] more pinpoint why we both have the same cancer.” (D-17) |
| “When I said I had a special needs [sibling]… they jumped all over me about like, ‘We really should test.’” (R-17) |
| Practical access and convenience affect uptake. | “A further drive would've made [genetic testing] harder.” (R-03) |
| “[Spouse’s] carrier screening was done with the IVF clinic… we had the option once we created embryos — it was integrated into that workflow.” (R-05) |
| “When I'm there, then after the visit, I just go down to the lab at <healthcare system>, and they take the blood sampling then.” (D-19) |
| They don't do the genetic testing at their hospital—[clinician] would have to send me to another hospital to do it.” (D-25) |
| Expectations about what testing may reveal guide uptake. | “…my [parent] is adopted. I've always thought about doing some sort of genetic testing, just because we don't know much about [adopted parent’s] side of my family, and any health concerns.” (R-21) |
| “They wanted to do—well, they asked if I would do genetic testing because there's just not a lot known on it [participant’s cardiac disease].” (D-12) |
| "It was discovered—a lab technician realized that I had <disease> and that could only be discovered if you had a genetics test.” (D-19) |
| “When I did start to read into this, it affected me a lot… there could be something very, very small in me that is affecting my fertility.” (R-07) |
