# Supplementary material for: Precision Medicine in Rural Settings: Patient Perspectives on Clinician-Ordered Genetic Testing
Source: Research Square preprint supplement (doi:10.21203/rs.3.rs-9097740/v1), 2026-04-14
Supplement: Supplementary file 3 [file eaef67408074a7e43bda0683.xlsx]

## Sheet: PRISM CODEBOOK
PRISM Primary code	PRISM secondary code	Definition/examples	Inclusion criteria	Exclusion criteria	Exemplar Quote	Notes
Perspectives on Genetic Testing		The views and experiences of stakeholders, including patients and clinicians, regarding genetic testing’s effectiveness, accessibility, and alignment with their needs and values.
Perspectives on Genetic Testing	Organization level	Compatibility of genetic testing with existing workflows. Clinic's readiness to offer genetic testing. The need for coordination across departments and specialities.				Create subcodes that denote important topics in this category.
Perspectives on Genetic Testing	Clinician level	Strength of evidence for genetic testing. Value of genetic testing. Barriers and facilitators to offering genetic testing in current clinic.				If the perspective is the patient's, but it's voiced by the clinician, it should be attributed to the patient. If the perspective is the clinician's, but the perspective is shared by the patient, it should be attributed to the clinician and noted in the Emergent code field as patient description. Create subcodes that reflect important issues in this category Do we code to person who said it?
Perspectives on Genetic Testing	Patient level	Value and social acceptability of genetic testing. Barriers and facilitators to patient(s) obtaining genetic testing through current healthcare team/clinic. Concerns about insurance discrimination/ privacy. Reproductive healthcare values.				Create subcodes that denote important topics in this category.
Characteristics	Organization level	Characteristics that affect organizations’ ability to successfully change behaviors around all aspects of genetic testing (e.g. blood draw, ordering, necessary follow up with test results).	This would be the appopriate code if the participant is, essentially, answering the question, "What would need to change for genetic testing to be offered?" The participant may describe a feature or a list of features that would need to change for the clinic to start/stop offering genetic testing	This is NOT a yes/no condition. If the participant indicates that the clinic does or does not offer genetic testing, code that segment as "Implementation and Sustainability Infrastructure"	"The drawback, I guess it would just be the getting it in here, the staffing, that type of thing." C-14 "I wouldn’t feel comfortable talking or going over genetic testing with my patients." C-14 "I mean, I think there would have to be training." C-14	For example: clinical leadership, management support and communication, genetics training and/or access to genetics-trained clinicians; these factors can be considered at the levels of top management, middle managers and delivery staff.
Characteristics	Clinician level	THESE WERE ALL MEASURED AT END OF INTERVIEW AND ARE NOT EXPECTED TO BE CODED. Number of years practicing as a clinician, number of years practicing as a clinician in rural community, race/ethnicity of majority of patients, type of clinician (e.g. physician, NP, etc.).
Characteristics	Patient level	THESE WERE MEASURED AT END OF INTERVIEW AND ARE NOT EXPECTED TO BE CODED unless explicitly addressed by interviewee. Age, race/ethnicity, gender, family/personal history of inherited condition, marital status, telehealth use, level of social needs, health literacy.
Implementation & Sustainability Infrastructure		Clinic resources and capacity to implement genetic testing (e.g. sufficent staff); staff roles and responsibilities, monitoring and evaluation systems; characteristics such as clinician training and support, resources for implementation and sustainability (e.g. EHR capabilities, adequate internet access)	Yes/no. If the participant indicates that the the clinic offers or does not offer genetic testing, this is the correct code to use.	Do NOT use this code if the participant is describing or itemizing the criteria that would need to change for the clinic to start/stop offering gentic testing.	"I hate when they ask for something and you’re [distorted audio 12:44], “Sorry, we don’t offer that here.” You know? It’s always nice to be able to give the public what they need or want. That would be nice." C-14 "I don’t get into a whole lot of conversations about that [genetic testing] because again, we don’t offer it here" C-14
External environment		Rurality (geographic location measured by RUC code); access to healthcare, travel time to appointments, health insurance policies; state and federal health policies (e.g. genetic information non-discrimination act (GINA)); community resources (e.g. phlebotomy centers, support for people with health needs, distance to healthcare facilities and specialists); market forces (e.g. gene/variant-disease…

## Sheet: IOF CODEBOOK
IOF Primary Code	IOF Secondary code	Definition	Inclusion criteria	Exclusion criteria	Exemplar Quote	Notes
Acceptability	Positive	Participant expresses satisfaction with genetic testing.	The perception among implementation stakeholders that genetic testing is agreeable, palatable, or satisfactory.			These are criteria to consider when deciding whether a segment should be coded as acceptability as the IOF Primary Code: Expressions of positive feelings (e.g., “we wanted to do it,” “it felt important”) Willingness to participate or endorse genetic testing Ease of decision-making due to perceived value of genetic testing. Statements reflecting moral or emotional alignment with genetic testing (e…
Acceptability	Neutral	Participant expresses neutral perspective about genetic testing (neither clearly negative nor positive)	The perception among implementation stakeholders that genetic testing is neither agreeable nor disagreeable.
Acceptability	Negative	Participant express dissatisfaction or concerns with genetic testing	The perception among implementation stakeholders that genetic testing is NOT agreeable, palatable, or satisfactory.
Appropriateness	Context Fit	Genetic testing is perceived as suitable for the clinic, the patients who are seen at the clinic, and/or the staff and clinicians who work there.	The perceived fit, relevance, or compatibility of genetic testing for a given clinic, provider, or consumer; and/or perceived fit of genetic testing to address a particular issue or problem.		"It [genetic testing] does come up when it’s something when it’s their last resort. Where they’ve tried this; they’ve tried that."	Criteria for coding a segment with "Appropriatness" include: Statements about genetic being suitable or well-matched to the situation Comments on relevance to personal or clinical needs Reflections on timing, setting, or population fit Comparisons to other options or expectations
Appropriateness	Context Mismatch	Genetic testing is perceived as irrelevant or NOT suitable for the clinic, the patients who are seen at the clinic, and/or the staff and clinicians who work there.	The perceived poor fit, irrelevance, or incompatibility of genetic testing for a given clinic, provider, or consumer; and/or perceived poor fit of genetic testing to address a particular issue or problem.

## Sheet: EMERGENT CODES
Primary code	Secondary code	Emergent Code	Definition	Inclusion criteria	Exclusion criteria	Sample Quote	Notes
Perspectives on Genetic Testing	Patient level	Clinician description	Any reference a rural clinican makes to their perception of patients' perspectives on genetic testing.		If the patient is providing their perspective on genetic testing, an emergent code does NOT need to be attached to the PRISM primary and secondary code.		The clinician description emergent code with the PRISM primary and secondary codes listed indicate that this is the clinician's perspective on the patient's perpective. The emergent code needs to be added only if it is a clinician is describing the patient's perspective.
Acceptability	Positive	Convenience	Use when a person mentions the convenience of some aspect of genetic testing as contributing to their perspective on its acceptability. It includes rurality when they mention the rurality as a contributor to the convenience.
Perspectives on Genetic Testing	Patient level	Cost	Any reference participant makes to the cost of genetic testing (regardless of whether it affected their interest in the testing). Cost is often a function of insurance coverage, so coding segments separately may require dividing a quote into pretty small segments.			"I think it [genetic testing] was $6,000 or something." R-06	Paticipant is a patient discussing the cost of genetic testing.
Perspectives on Genetic Testing	Patient level	Decision-making	When participant describes the process that s/he uses and the factors they considered to decide whether to pursue genetic testing (can include the opinions/thoughts/ perspectives/recommendations of others if they are considered or not). The ACTION of making a decision.			"We're [participant and husband] obviously not going just blindly do stuff." R-06 "If it's something that the doctor is suggesting, we take that into account, too, and we feel like that's important to consider…" R-06
		Education/knowledge	Any reference to role of genetic testing knowledge or education (before their provider mentioned it) to participant's interest in genetic testing (regardless of whether it affected their interest in the testing).			"I don't know a whole lot about it, so those are things that I would be the most curious about." R-06
Perspectives on Genetic Testing	Patient level	Expectations of genetic testing	Any reference to what a person expects to gain or lose from genetic testing, doesn't have to be RGCT or disease risk genetic testing, and/or what the person expects to occur before testing. Not necessarily X driving Y, could be reasons they were thinking of/considering when expecting			I think if I was getting genetic testing, I would want to have it all laid out before me. R-06	I'm not sure the code name and/or defintion make sense, but in this quote the interviewee is explaining a condition she has for receiving genetic testing (ex. If she gets the testing, she would want to know everything that it revealed)
Perspectives on Genetic Testing	[select level]	Family	References to the impact of genetic testing or the information learned from it on patient's biological (blood) relative(s) (child/children/siblings/grandchildren)
		Incidental finding	When participant references their opinion on an incidental finding (a clinically meaninful result that was not the reason that the genetic testing was performed) that was identified.			"...the initial goal was to find out why my body's goin' nuts with the immune system. The happy surprise was they discovered the Klinefelter's Syndrome."
Perspectives on Genetic Testing	Patient level	Insurance	Any reference participant makes to their insurance coverage of genetic testing (regardless of whether it affected their interest in the testing). Cost may be a function of insurance coverage, so coding segments separately may require dividing a quote into pretty small segments.			"I'm very fortunate that I had really good insurance…" R-06	For IOF, this emergent code may be a context fit or mismatch. If the participant specifically mentions health insurance policy, External
External environment		Insurance	Any reference participant makes to insurance policy (broadly) related to genetic testing (not their insurance specifically).		If the person is describing their insurance specifically, the segment should be coced as "Perspectives on Genetic Testing"->Patient level->Insurance.	"…it’s an insurance thing. We’re always hitting our head against the wall as far as like coverage. Will they cover it type of a thing?" C-14	D-19 is describing what he believes is an insurance policy. C-14 is describing an insurance policy issue.
Perspectives on Genetic Testing	Patient level	Partner	Any reference participant makes to discussing or not discussing genetic testing with a spouse/romantic partner and their partner's opinion(s) on genetic testing.	When participant describes their partner's contributed to conversation about genetic testing.	If participant describes interaction with a family member, it should be coded separately from partner.	"We [participant and husband] didn't really have a long discussion about it [RGCT]." R-06 "I think that if money were more of a factor, he may have had more opinions about it." R-06	The second sample quote is a tough one to code, because it's talking about cost as something that the partner was considering, but since fundamentally the quote is about the partner's perspective, I chose to leave it as that.
Perspectives on Genetic Testing	Clinician level	Patient description	Any reference a rural resident makes to their perception of clincian's perspective(s) on genetic testing.		If the clinician is providing their perspective, there should not be an Emergent code. This should ONLY be used when the clinician's perspective is provided by a rural resident.
Perspectives on Genetic Testing	Patient level	Reproductive healthcare	When participant references a reproductive healthcare value or opinion that influences their decision about genetic testing.	Does NOT require a reference to abortion. Any reference to how participant's perspectives on reproductive healthcare contribute to their decision-making about genetic testing		"…even earlier, if he had had a problem, it wouldn't have changed our decision to have him." R-06
		Rurality - negative	Any reference participant makes to negative experiences/perceptions about rurality/living in a rural community.	Specifically indicates that whatever quality is being described is a negative about living in a rural community (either generally or specifically their rural community.) They do NOT have to tie their interest in genetic testing to this.	If they con't explicitly state it as a negative, it doesn't belong here.	"Not very good for specialist care, which is why I come to be with you." ""a lot of the doctors here will not address anything they didn't diagnose. I think that might have to do with the insurance issues. " D-19They [rural clinicians] won't even talk to you about it. They won't do anything about it. " D-19
		Rurality - neutral	Any reference that is neither positive nor negative that the participant makes to rurality	No evaluation of the valence of rural health care.	If they mention the quality as a positive or negative, the segment shouldn't be coded as neutral.	"Lots of times, the doctors only stay for their internship and then they leave, so we get lots of intern-style doctors." D-19 "There is no healthcare in <<current city of residence>>. We're a small, tiny, little mountain town. " D-19	The participant in these quotes doesn't specifically say that these qualities are positive or negative and they are answering a question about how they feel about healthcare available in their town or county (not answering a question about what they don't like about healthcare), thus, these segments are coded as neutral.
		Rurality - positive	Any reference participant makes to positive experiences or perceptions about rurality (living in rural community/rural healthcare/etc.).	Specifically indicates that whatever quality is being described is a positive about living in a rural community (either generally or specifically their rural community.) They do NOT have to tie their interest in genetic testing to this.	If they con't explicitly state it as a positive, it doesn't belong here.	"For general practitioners, it's [healthcare in nearby town] good."
Characteristics	Organization level	Telehealth	When person describes efforts to receive, or actual receipt of, any healthcare through telehealth. Does NOT require that healthcare be related to genetic testing.			"Well, during COVID, we tried this. During '21 and '22, '23, '24—'21 and '22, we tried doin'—<Name> and I tried doin' this Zoom thingy, but it didn't work too well. I didn't have a good internet connection out here. We did voice. We talked on the phone." D-19
Characteristics	Organization Level	Training	When person indicates that they perceive clinician training as necessary for genetic testing to be offered at the clinic
Perspectives on Genetic Testing	Patient level	Value	Value of genetic testing (an assessment of its cost AND utility)			I"f we...knew the price tag and hadn't done it, I think we probably would be like, we're not spending $6,000 on something that's not necessary because our opinion is that we'll deal with whatever happens." R-06

## Sheet: DO NOT EDIT
Coder	PRISM Primary code	PRISM secondary code	IOF Primary code	IOF Secondary code	All primary codes	All secondary codes	Page #s	Type of genetic testing discussed	State of residence	RUC code of residence or clinic	Yes/No	Highest level of schooling options	Race/origin	Gender	R-transcript Number
JP	Perspectives on Genetic Testing	Organization level	Acceptability	Positive	Perspectives on Genetic Testing	Organization level	Page 01	Cancer	ID	4	Yes	Elementary school	White	Woman	R-03
SD	Characteristics	Clinician level	Appropriateness	Neutral	Characteristics	Clinician level	Page 02	Cardiovascular disease	MT	5	No	Junior high or some high school	Black or African American	Man	R-04
GP	Implementation & Sustainability Infrastructure	Patient level		Negative	Implementation & Sustainability Infrastructure	Patient level	Page 03	Other adult onset dz	NV	6		High school diploma or GED	Asian or Asian American	Some other way	R-05
ACM	External environment			Context Fit	External environment	Positive	Page 04		WY	7		Some college or Associate degree	American Indian or Alaska Native		R-06
JLH				Context Mismatch	Acceptability	Neutral	Page 05		UT	8		College degree or higher	Native Hawaiian or other Pacific Islander		R-07
Consensus					Appropriateness	Negative	Page 06			9			Some other race or oirign		R-08
						Context Fit	Page 07								R-10
						Context Mismatch	Page 08								R-12
							Page 09								R-13
							Page 10								R-16
							Page 11								R-17
							Page 12								R-19
							Page 13								R-21
							Page 14								R-22
							Page 15								R-23
							Page 16
							Page 17
							Page 18
							Page 19
							Page 20
							Page 21
